# Supplementary material for: Interleukin 36 receptor-inducible matrix metalloproteinase 13 mediates intestinal fibrosis
Source: PubMed Central journal article supplement (PMC10189878; doi:10.3389/fimmu.2023.1163198), 2023-05-03
Supplement: Table_1.pdf [file Table_1.pdf]

|                                        |              |               |
|----------------------------------------|--------------|---------------|
| n                                      | 8            |               |
| Mean age, y (range)                    | 53 (36-78)   |               |
| Females                                | 5            |               |
| Males                                  | 3            |               |
| Mean disease duration, y               | 18 (6-36)    |               |
| Localization                           |              |               |
| Caecum                                 | 1            |               |
| Colon ascendens                        | 2            |               |
| Colon transversum                      | 2            |               |
| Sigma                                  | 3            |               |
| Rectum                                 | 0            |               |
| Inflammatory activity during endoscopy | Healthy area | Stenotic area |
| no                                     | 8 (100%)     | 0             |
| low                                    | 0            | 4 (50%)       |
| medium                                 | 0            | 1 (12.5%)     |
| high                                   | 0            | 2 (25%)       |
| N.A.                                   | 0            | 1 (12.5%)     |

Supplemental Table 1. Characteristics of CD patient samples of the stenosis cohort
