# Supplementary material for: Interleukin 36 receptor-inducible matrix metalloproteinase 13 mediates intestinal fibrosis
Source: PubMed Central journal article supplement (PMC10189878; doi:10.3389/fimmu.2023.1163198), 2023-05-03
Supplement: Table_2.pdf [file Table_2.pdf]

|                                     | non-IBD      | CD: B1<br>(non-stricturing,<br>non-penetrating) | CD: B2<br>(stricturing) |
|-------------------------------------|--------------|-------------------------------------------------|-------------------------|
| n                                   | 51           | 45                                              | 22                      |
| Mean age, y (range)                 | 59.3 (22-84) | 39.9 (21-70)                                    | 37.8 (22-74)            |
| Mean disease<br>duration, y (range) | /            | 2.3 (1-4)                                       | 14.1 (10-27)            |
| Females                             | 24           | 29                                              | 15                      |
| Males                               | 27           | 15                                              | 7                       |
| N.A.                                | 0            | 1                                               | 0                       |
| Origin of biopsy                    |              |                                                 |                         |
| Ileum                               | 29           | 34                                              | 16                      |
| Colon                               | 2            | 11                                              | 6                       |

Supplemental Table 2. Characteristics of samples from the IBDome cohort
