# Supplementary material for: Interleukin 36 receptor-inducible matrix metalloproteinase 13 mediates intestinal fibrosis
Source: PubMed Central journal article supplement (PMC10189878; doi:10.3389/fimmu.2023.1163198), 2023-05-03
Supplement: Table_3.pdf [file Table_3.pdf]

|                                      | Uninflamed control | CD patient with stenosis |
|--------------------------------------|--------------------|--------------------------|
| n                                    | 11                 | 8                        |
| Mean age, y (range)                  | 32.2 (18-50)       | 48.9 (29-68)             |
| Mean disease duration, y             | 5.9                | 6.3                      |
| Females                              | 5                  | 3                        |
| Males                                | 6                  | 5                        |
| Localization                         |                    |                          |
| Caecum                               | 1                  | 1                        |
| Colon ascendens                      | 3                  | 0                        |
| Colon transversum                    | 4                  | 1                        |
| Sigma                                | 1                  | 5                        |
| Rectum                               | 2                  | 1                        |
| Active inflammation (tissue section) | 0                  | 8                        |

Supplemental Table 3. Characteristics of samples of the IF cohort
